# Supplementary material
Source: publisher figshare collection journal article supplement (https://gsapubs.figshare.com/ndownloader/files/23316320)
Supplement: Supplementary file 1 [file 23316320]

## Sheet: TableArgon.csv
Sinnesael, M., Montanari, A., Frontalini, F., Coccioni, R., Gattacceca, J., Snoeck, C., Wegner, W., Koeberl, C., Morgan, L.E., de Winter, N.J., DePaolo, D.J., and Claeys, P., 2019, Multiproxy Cretaceous-Paleogene boundary event stratigraphy: An Umbria-Marche basinwide perspective, in Koeberl, C., and Bice, D.M., eds., 250 Million Years of Earth History in Central Italy: Celebrating 25 Years of th…
GSA Data Repository Item 2019216
Table DR2: 40Ar/39Ar_ALE_dating (USGS Data Release: https://doi.org/10.5066/P9WOEI1N)
				Relative Isotopic Abundances (fA)										Background Isotopic Abundances (fA)										Derived Results														Irradiation			Inverse Isochron Data
Lab ID#	Sample	Material	Watts	40Ar		39Ar		38Ar		37Ar		36Ar		40Ar		39Ar		38Ar		37Ar		36Ar		Ca/K		Cl/K		%40Ar*	Age (Ma) K08		w/±J K08	Age (Ma) R98		w/±J R98	Age (Ma) R11		39Ar Mol	Irrad.	J		36Ar/40Ar		39Ar/40Ar		39Ar/36Ar	40Ar/39Ar	36Ar/39Ar
				±1s		±1s		±1s		±1s		±1s		±1s		±1s		±1s		±1s		±1s		±1s		±1s			±1s		±1s	±1s		±1s	±1s (w/±J)				( X 10-3) ± 1s		±%1s		±%1s		±%1s	Er. Corr.	Er. Corr.
2137-01A	COH-ALE	biotite	12	49.3727	0.272325	6.00674	0.249033	0.260443	0.104288	0.139675	0.116732	0.0041098	0.0008113	1.036	0.26	-0.041	0.24	-0.0071	0.097	0.007	0.11	0.004952	0.00065	1.13743	0.951765	0.0899149	2.76e-05	98.1171	65.5894	2.73722	2.73772	65.1623	2.71902	2.71951	65.6638	2.74573	3.20466e-16	DT-37a	0.0045284	3.6766e-06	6.31e-05	36.1753	0.12177	4.18516	36.3792	0.99337	0.0020115
2137-02A	COH-ALE	biotite	12	34.3758	0.272029	2.72497	0.246571	-0.123347	0.105025	-0.039656	0.117063	0.0911412	0.0012881	1.036	0.26	-0.041	0.24	-0.0071	0.097	0.007	0.11	0.004952	0.00065	-0.712164	2.10327	-0.184826	6.1e-05	20.5505	21.3278	2.49074	2.4908	21.1909	2.47464	2.4747	21.356	2.49928	1.4538e-16	DT-37a	0.0045284	3.6766e-06	0.0026611	1.82834	0.0793922	9.08209	9.18674	0.161562	0.0377294
2137-03A	COH-ALE	biotite	12	23.5753	0.273542	2.69025	0.246571	0.140631	0.105405	-0.179917	0.116732	0.0025676	0.0007826	1.036	0.26	-0.041	0.24	-0.0071	0.097	0.007	0.11	0.004952	0.00065	-3.27393	2.14525	0.115334	6.22e-05	95.2711	67.745	6.22714	6.22737	67.3035	6.18566	6.18589	67.8212	6.24639	1.43528e-16	DT-37a	0.0045284	3.6766e-06	0.0001584	29.643	0.114408	9.22902	30.9394	0.954669	0.0049245
2137-04A	COH-ALE	biotite	12	29.5422	0.271448	3.60416	0.250121	-0.0640305	0.103931	0.0497166	0.11519	0.002728	0.0007826	1.036	0.26	-0.041	0.24	-0.0071	0.097	0.007	0.11	0.004952	0.00065	0.675767	1.56641	-0.0872207	4.54e-05	97.5407	65.0213	4.53968	4.53998	64.5979	4.50949	4.50979	65.0952	4.5538	1.92286e-16	DT-37a	0.0045284	3.6766e-06	8.24e-05	45.1835	0.122131	7.00369	45.6561	0.988188	0.0026702
2137-05A	COH-ALE	biotite	12	44.0145	0.266175	5.12874	0.247034	-0.0355507	0.104288	0.0217815	0.116093	0.0006553	0.0007561	1.036	0.26	-0.041	0.24	-0.0071	0.097	0.007	0.11	0.004952	0.00065	0.20813	1.10936	-0.0555199	3.22e-05	99.6312	69.44	3.35063	3.35108	68.9871	3.32829	3.32874	69.5176	3.36095	2.73624e-16	DT-37a	0.0045284	3.6766e-06	1.24e-05	199.739	0.116669	4.8559	199.761	0.999704	0.0003778
2137-06A	COH-ALE	biotite	12	20.5186	0.265149	2.66287	0.24727	-0.0030444	0.104652	0.105977	0.116093	-5.15e-05	0.0009794	1.036	0.26	-0.041	0.24	-0.0071	0.097	0.007	0.11	0.004952	0.00065	1.95109	2.14499	-0.0385682	6.22e-05	101.089	63.4066	5.9609	5.96111	62.9939	5.9213	5.92152	63.4791	5.97951	1.42067e-16	DT-37a	0.0045284	3.6766e-06	-3.65e-05	-167.047	0.129855	9.38444	-167.359	0.998427	0.0010655
2137-07A	COH-ALE	biotite	12	3.5218	0.272624	0.0128957	0.248255	-0.16587	0.104652	0.0040047	0.11519	0.0083215	0.0008176	1.036	0.26	-0.041	0.24	-0.0071	0.097	0.007	0.11	0.004952	0.00065	15.2352	527.313	-37.6477	0.0152921	29.1927	566.423	9437.35	9437.35	562.185	9357.3	9357.3	565.968	9437.71	6.88003e-19	DT-37a	0.0045284	3.6766e-06	0.0023716	15.5334	0.0036444	1936.54	1936.47	0.0060285	0.0019922
2137-08A	COH-ALE	biotite	12	32.2943	0.27417	3.95721	0.246123	0.0891713	0.103931	0.0305723	0.115484	0.0020757	0.0007718	1.036	0.26	-0.041	0.24	-0.0071	0.097	0.007	0.11	0.004952	0.00065	0.37916	1.43243	0.0296311	4.15e-05	98.2828	65.2186	4.08295	4.08328	64.7939	4.0558	4.05613	65.2927	4.09565	2.11122e-16	DT-37a	0.0045284	3.6766e-06	5.75e-05	58.9054	0.122681	6.27961	59.1823	0.994362	0.0019503
2137-09A	COH-ALE	biotite	12	48.4798	0.271162	5.7892	0.246801	0.121481	0.104652	0.038777	0.117063	0.0048205	0.0008113	1.036	0.26	-0.041	0.24	-0.0071	0.097	0.007	0.11	0.004952	0.00065	0.328849	0.992854	0.0249703	2.88e-05	97.2013	66.1686	2.83823	2.83872	65.7376	2.81935	2.81983	66.2435	2.84704	3.08861e-16	DT-37a	0.0045284	3.6766e-06	9.37e-05	24.8658	0.119558	4.30114	25.1925	0.985352	0.0029279
2137-10A	COH-ALE	biotite	12	27.072	0.266391	2.76753	0.24727	0.135721	0.104288	0.0671027	0.115484	0.0822625	0.0012846	1.036	0.26	-0.041	0.24	-0.0071	0.097	0.007	0.11	0.004952	0.00065	1.19124	2.05288	0.0905118	5.95e-05	9.79307	7.91545	1.70943	1.70945	7.86487	1.69848	1.6985	7.92638	1.71547	1.47651e-16	DT-37a	0.0045284	3.6766e-06	0.0030214	2.08218	0.102315	8.99454	9.1161	0.177179	0.0517302
2137-11A	COH-ALE	biotite	12	23.3748	0.273854	2.96047	0.245274	0.084261	0.104288	0.0674934	0.11519	0.000877	0.0007462	1.036	0.26	-0.041	0.24	-0.0071	0.097	0.007	0.11	0.004952	0.00065	1.12049	1.91458	0.0469728	5.55e-05	99.4791	63.9079	5.33636	5.33661	63.4919	5.3009	5.30115	63.9808	5.35301	1.57945e-16	DT-37a	0.0045284	3.6766e-06	1.74e-05	263.908	0.126767	8.37289	263.975	0.999496	0.0006221
2137-12A	COH-ALE	biotite	12	20.1872	0.265549	2.28265	0.247511	0.0950637	0.104288	-0.198866	0.11519	0.0003771	0.0007664	1.036	0.26	-0.041	0.24	-0.0071	0.097	0.007	0.11	0.004952	0.00065	-4.28339	2.52418	0.0849172	7.32e-05	97.5014	69.8995	7.57658	7.57678	69.4436	7.52604	7.52625	69.9775	7.59988	1.21782e-16	DT-37a	0.0045284	3.6766e-06	8.37e-05	64.5153	0.11341	10.9072	65.3272	0.985995	0.0024609
2137-13A	COH-ALE	biotite	12	30.8622	0.264955	3.90225	0.246571	-0.130123	0.104652	-0.0210978	0.114625	0.0006968	0.0007825	1.036	0.26	-0.041	0.24	-0.0071	0.097	0.007	0.11	0.004952	0.00065	-0.265973	1.44514	-0.132093	4.19e-05	99.1291	63.7578	4.05757	4.05789	63.3428	4.03062	4.03093	63.8306	4.07024	2.0819e-16	DT-37a	0.0045284	3.6766e-06	2.92e-05	122.101	0.126624	6.37756	122.216	0.998637	0.0009477
2137-14A	COH-ALE	biotite	12	44.9227	0.264394	5.71738	0.248004	-0.0251408	0.104652	-0.0486421	0.116093	0.0004038	0.0007717	1.036	0.26	-0.041	0.24	-0.0071	0.097	0.007	0.11	0.004952	0.00065	-0.418687	0.999436	-0.048184	2.9e-05	99.4923	63.5733	2.77696	2.77743	63.1596	2.75851	2.75897	63.646	2.78563	3.05029e-16	DT-37a	0.0045284	3.6766e-06	1.7e-05	143.873	0.127463	4.37779	143.906	0.999537	0.0005509
2137-15A	COH-ALE	biotite	12	11.9165	0.272029	0.989699	0.249299	-0.148783	0.105405	0.129224	0.116732	0.0166241	0.0008753	1.036	0.26	-0.041	0.24	-0.0071	0.097	0.007	0.11	0.004952	0.00065	6.4279	6.02807	-0.479667	0.0001748	60.3789	59.3507	15.2036	15.2036	58.965	15.1028	15.1029	59.4196	15.2515	5.28017e-17	DT-37a	0.0045284	3.6766e-06	0.0013271	7.78068	0.0829531	25.359	26.277	0.27009	0.0264228
2137-16A	COH-ALE	biotite	10	14.2044	0.257389	3.54137	0.204105	0.090939	0.0822628	0.378686	0.10245	0.0028059	0.0006337	0.818	0.24	-0.068	0.18	0.006	0.07	-0.0174	0.093	0.003813	0.00046	7.85042	2.17152	0.0390279	6.3e-05	102.121	33.6812	2.19227	2.19244	33.4641	2.17799	2.17815	33.7239	2.1996	1.88963e-16	DT-37a	0.0045284	3.6766e-06	-7.1e-05	-119.665	0.248977	6.06111	-119.865	0.998721	0.0045307
2137-17A	COH-ALE	biotite	10	25.4217	0.245569	3.13069	0.210492	0.0459605	0.0822628	0.240378	0.100499	0.0026901	0.0006615	0.818	0.24	-0.068	0.18	0.006	0.07	-0.0174	0.093	0.003813	0.00046	5.63885	2.38783	0.0070039	6.92e-05	99.675	65.9236	4.51488	4.51519	65.4942	4.48485	4.48515	65.9983	4.5289	1.6705e-16	DT-37a	0.0045284	3.6766e-06	1.09e-05	436.512	0.123065	6.80889	436.482	0.999878	0.0003146
2137-18A	COH-ALE	biotite	10	2.5344	0.258118	0.0436471	0.227348	-0.0525404	0.0812483	0.0659306	0.100874	0.0069504	0.000736	0.818	0.24	-0.068	0.18	0.006	0.07	-0.0174	0.093	0.003813	0.00046	110.972	602.448	-3.60243	0.017471	25.6657	124.516	661.203	661.203	123.689	656.645	656.645	124.626	662.982	2.32896e-18	DT-37a	0.0045284	3.6766e-06	0.0024898	22.3004	0.0165084	544.256	544.291	0.0324096	0.0085473
2137-19A	COH-ALE	biotite	10	21.301	0.259617	5.69873	0.192575	0.0521475	0.0843925	0.256983	0.10245	0.004692	0.0006832	0.818	0.24	-0.068	0.18	0.006	0.07	-0.0174	0.093	0.003813	0.00046	3.31468	1.32618	-0.0091313	3.85e-05	97.0276	29.8008	1.19658	1.19682	29.609	1.1888	1.18904	29.8392	1.20062	3.04078e-16	DT-37a	0.0045284	3.6766e-06	9.96e-05	58.2971	0.267646	3.59826	58.3376	0.998099	0.0070938
2137-20A	COH-ALE	biotite	10	94.5499	0.246909	11.6035	0.193291	0.169406	0.0817512	0.140359	0.100874	0.0073969	0.0010384	0.818	0.24	-0.068	0.18	0.006	0.07	-0.0174	0.093	0.003813	0.00046	0.889434	0.639392	0.006609	1.85e-05	98.1119	65.0128	1.12177	1.12297	64.5895	1.11432	1.1155	65.0867	1.12528	6.19149e-16	DT-37a	0.0045284	3.6766e-06	6.32e-05	24.2785	0.122863	1.68722	24.3161	0.997593	0.0016676
2137-21A	COH-ALE	biotite	10	3.6303	0.255282	0.597866	0.193289	-0.0031426	0.0822628	-0.141043	0.102864	0.0006079	0.0006268	0.818	0.24	-0.068	0.18	0.006	0.07	-0.0174	0.093	0.003813	0.00046	-17.3523	13.8429	-0.0521903	0.0004014	83.3111	41.1176	14.4124	14.4125	40.852	14.3181	14.3181	41.1685	14.4598	3.19015e-17	DT-37a	0.0045284	3.6766e-06	0.000559	60.007	0.166043	32.888	67.3117	0.874195	0.0250774
2137-22A	COH-ALE	biotite	10	3.0429	0.246909	-0.111995	0.192575	0.040952	0.0822628	-0.0618283	0.113158	0.0090395	0.0007517	0.818	0.24	-0.068	0.18	0.006	0.07	-0.0174	0.093	0.003813	0.00046	40.6288	102.029	-1.04801	0.0029588	5.36972	-12.3095	41.7206	41.7206	-12.2314	41.457	41.457	-12.3276	41.8742	-5.97591e-18	DT-37a	0.0045284	3.6766e-06	0.0031696	16.3009	-0.0362748	-174.883	-175.48	0.0699535	0.0230936
2137-23A	COH-ALE	biotite	10	45.0255	0.257389	5.38576	0.193653	0.139158	0.0849449	0.0495212	0.10245	0.0062454	0.0006688	0.818	0.24	-0.068	0.18	0.006	0.07	-0.0174	0.093	0.003813	0.00046	0.676916	1.40062	0.0388635	4.06e-05	96.2064	65.3945	2.41176	2.41233	64.9686	2.39572	2.39628	65.4687	2.41927	2.87378e-16	DT-37a	0.0045284	3.6766e-06	0.0001271	21.4878	0.119761	3.64279	21.732	0.985913	0.0041785
2137-24A	COH-ALE	biotite	10	36.7743	0.247146	5.77432	0.215801	-0.0273996	0.080269	0.120531	0.102044	0.0046019	0.0006832	0.818	0.24	-0.068	0.18	0.006	0.07	-0.0174	0.093	0.003813	0.00046	1.53721	1.30271	-0.0494709	3.78e-05	97.2161	50.5587	1.97115	1.97157	50.231	1.95816	1.95857	50.6193	1.97749	3.08111e-16	DT-37a	0.0045284	3.6766e-06	9.32e-05	35.9889	0.157168	3.80063	36.1319	0.994466	0.003306
2137-25A	COH-ALE	biotite	10	48.5043	0.254607	5.26642	0.192225	0.0032408	0.0817512	0.0228559	0.100499	0.0023871	0.0006759	0.818	0.24	-0.068	0.18	0.006	0.07	-0.0174	0.093	0.003813	0.00046	0.319781	1.40615	-0.0338289	4.08e-05	98.6572	73.7011	2.72835	2.72898	73.2199	2.71011	2.71074	73.7822	2.73668	2.81011e-16	DT-37a	0.0045284	3.6766e-06	4.5e-05	55.8033	0.108721	3.68901	55.8726	0.997821	0.0013398
2137-26A	COH-ALE	biotite	10	6.6841	0.25632	0.529023	0.193652	0.0542099	0.0827829	0.118284	0.102044	0.0164116	0.0008	0.818	0.24	-0.068	0.18	0.006	0.07	-0.0174	0.093	0.003813	0.00046	16.5076	15.4701	0.245453	0.0004486	32.0896	33.4614	14.2516	14.2516	33.2457	14.1588	14.1588	33.5039	14.2992	2.82281e-17	DT-37a	0.0045284	3.6766e-06	0.0022746	9.39442	0.078755	37.0472	37.7241	0.206935	0.0422705
2137-27A	COH-ALE	biotite	10	17.8947	0.255282	2.39573	0.190217	-0.0120794	0.0833113	-0.0291071	0.102864	0.0021614	0.0008989	0.818	0.24	-0.068	0.18	0.006	0.07	-0.0174	0.093	0.003813	0.00046	-0.897306	3.17185	-0.0505326	9.2e-05	95.8762	58.3036	4.85001	4.85023	57.9248	4.8179	4.81812	58.3715	4.86533	1.27834e-16	DT-37a	0.0045284	3.6766e-06	0.0001381	55.592	0.134126	8.06685	56.0414	0.989622	0.0045418
2137-28A	COH-ALE	biotite	10	43.8844	0.246447	4.41272	0.191537	0.0683516	0.0878199	-0.103047	0.10245	0.0335212	0.0009099	0.818	0.24	-0.068	0.18	0.006	0.07	-0.0174	0.093	0.003813	0.00046	-1.72526	1.7169	0.0052306	4.98e-05	76.4855	61.8502	2.78677	2.78721	61.4479	2.76828	2.76871	61.9213	2.79551	2.35459e-16	DT-37a	0.0045284	3.6766e-06	0.0007876	4.02564	0.100766	4.37506	5.85604	0.669959	0.0179181
2137-29A	COH-ALE	biotite	10	27.3488	0.256673	3.43066	0.1912	0.101643	0.0812483	-0.0508887	0.101646	0.0011584	0.0006474	0.818	0.24	-0.068	0.18	0.006	0.07	-0.0174	0.093	0.003813	0.00046	-1.09648	2.19098	0.0501842	6.35e-05	98.1991	63.6359	3.64642	3.64677	63.2217	3.6222	3.62255	63.7086	3.6578	1.83057e-16	DT-37a	0.0045284	3.6766e-06	6.03e-05	73.6099	0.12568	5.65113	73.7393	0.997064	0.0021194
2137-30A	COH-ALE	biotite	10	21.579	0.247146	2.82317	0.1912	-0.0224892	0.0817512	0.12815	0.0997752	0.0003574	0.0008735	0.818	0.24	-0.068	0.18	0.006	0.07	-0.0174	0.093	0.003813	0.00046	3.35648	2.62317	-0.0583261	7.61e-05	101.265	63.0378	4.42127	4.42156	62.6276	4.39191	4.3922	63.11	4.43509	1.50642e-16	DT-37a	0.0045284	3.6766e-06	-4.24e-05	-145.822	0.130856	6.87942	-146.055	0.99889	0.001308
2137-31A	COH-ALE	biotite	10	31.6966	0.246676	3.58799	0.210492	0.056665	0.080269	-0.0637818	0.103285	0.0023574	0.0009853	0.818	0.24	-0.068	0.18	0.006	0.07	-0.0174	0.093	0.003813	0.00046	-1.31491	2.1307	0.0099243	6.18e-05	97.1765	69.664	4.16661	4.16698	69.2097	4.13882	4.13919	69.7418	4.17944	1.91452e-16	DT-37a	0.0045284	3.6766e-06	9.46e-05	47.9072	0.113421	5.9166	48.1954	0.992455	0.0021385
2137-32A	COH-ALE	biotite	10	44.8966	0.245359	6.15524	0.210492	-0.0302475	0.0827829	-0.0367258	0.10245	0.0053583	0.0006688	0.818	0.24	-0.068	0.18	0.006	0.07	-0.0174	0.093	0.003813	0.00046	-0.441581	1.23193	-0.0501178	3.57e-05	96.1615	57.1323	2.01411	2.01463	56.7612	2.00079	2.0013	57.1992	2.0205	3.28437e-16	DT-37a	0.0045284	3.6766e-06	0.0001286	21.3765	0.137327	3.4636	21.5993	0.98711	0.004038
2137-33A	COH-ALE	biotite	10	7.725	0.255971	0.508092	0.1912	0.0946709	0.0788691	0.122387	0.101256	0.0195314	0.001183	0.818	0.24	-0.068	0.18	0.006	0.07	-0.0174	0.093	0.003813	0.00046	17.833	16.2084	0.48436	0.00047	29.4158	36.8952	16.3471	16.3471	36.6572	16.2403	16.2404	36.9416	16.4013	2.71113e-17	DT-37a	0.0045284	3.6766e-06	0.0023642	9.18757	0.0654123	38.0436	38.7647	0.205694	0.0314238
2137-34A	COH-ALE	biotite	10	20.164	0.264008	2.38849	0.1912	-0.0109991	0.0838479	0.0581166	0.101256	0.000299	0.000882	0.818	0.24	-0.068	0.18	0.006	0.07	-0.0174	0.093	0.003813	0.00046	1.802	3.14292	-0.0486826	9.11e-05	100.404	68.8816	5.66691	5.66718	68.4325	5.62914	5.6294	68.9587	5.68438	1.27448e-16	DT-37a	0.0045284	3.6766e-06	-1.35e-05	-494.548	0.118546	8.11927	-494.708	0.999866	0.0004267
2137-35A	COH-ALE	biotite	10	6.5252	0.247631	0.798048	0.19962	-0.0912336	0.0884164	-0.100312	0.10415	0.0044158	0.0008074	0.818	0.24	-0.068	0.18	0.006	0.07	-0.0174	0.093	0.003813	0.00046	-9.31424	9.94723	-0.370083	0.0002885	74.9663	49.8585	13.1804	13.1804	49.5355	13.0936	13.0936	49.9184	13.2228	4.25831e-17	DT-37a	0.0045284	3.6766e-06	0.0008385	24.5743	0.122923	25.2189	34.579	0.689336	0.0232537
2137-36A	COH-ALE	biotite	10	3.7082	0.255625	0.268926	0.196319	-0.0394789	0.0866479	0.0172885	0.10415	0.0128721	0.000816	0.818	0.24	-0.068	0.18	0.006	0.07	-0.0174	0.093	0.003813	0.00046	4.76541	28.9178	-0.486455	0.0008386	-2.38033	-2.72341	14.7245	14.7245	-2.70607	14.6309	14.6309	-2.7273	14.7776	1.43496e-17	DT-37a	0.0045284	3.6766e-06	0.0034291	12.552	0.0724907	73.4759	73.7606	0.118611	0.0515453
2138-01A	FCs-A9	sanidine	12	906.848	0.295297	263.814	0.273379	3.45657	0.107004	0.0356514	0.117063	0.0036772	0.0008874	1.036	0.26	-0.041	0.24	-0.0071	0.097	0.007	0.11	0.004952	0.00065	0.0064262	0.0211007	0.0025663	6.1192e-07	99.8886	28.1938	0.0327052	0.0398197	28.0124	0.0324928	0.0395563	28.2302	0.0330163	1.40746e-14	DT-37a	0.0045284	3.6766e-06	3.73084e-06	34.8935	0.291372	0.110124	34.893	0.999995	0.0003624
2138-02A	FCs-A9	sanidine	12	778.788	0.290689	226.361	0.264347	2.89659	0.103931	0.224457	0.11519	0.0069011	0.0009081	1.036	0.26	-0.041	0.24	-0.0071	0.097	0.007	0.11	0.004952	0.00065	0.0471697	0.0242072	0.0016735	7.02009e-07	99.7924	28.1918	0.0369878	0.0434051	28.0105	0.0367476	0.0431188	28.2283	0.0372902	1.20765e-14	DT-37a	0.0045284	3.6766e-06	6.95258e-06	21.8598	0.291111	0.123947	21.8594	0.999984	0.0006352
2138-03A	FCs-A9	sanidine	12	890.507	0.290689	259.207	0.268809	3.20133	0.105794	-0.104024	0.116093	0.002728	0.0008806	1.036	0.26	-0.041	0.24	-0.0071	0.097	0.007	0.11	0.004952	0.00065	-0.0190974	0.0213131	0.0003887	6.18081e-07	99.8857	28.1768	0.0327508	0.0398494	27.9955	0.0325381	0.0395859	28.2133	0.0330615	1.38289e-14	DT-37a	0.0045284	3.6766e-06	3.82815e-06	34.3596	0.29154	0.110223	34.3591	0.999995	0.0003691
2138-04A	FCs-A9	sanidine	12	645.235	0.286356	187.757	0.259809	2.39859	0.105794	0.115549	0.116732	0.0019539	0.0011432	1.036	0.26	-0.041	0.24	-0.0071	0.097	0.007	0.11	0.004952	0.00065	0.0293069	0.0296069	0.0016213	8.58601e-07	99.9455	28.2025	0.0447737	0.0502093	28.021	0.0444829	0.0498795	28.239	0.0450717	1.0017e-14	DT-37a	0.0045284	3.6766e-06	1.82653e-06	118.793	0.291447	0.146476	118.792	0.999999	0.0001342
2138-05A	FCs-A9	sanidine	12	1192.1	0.300167	342.678	0.274014	4.2264	0.105406	0.458877	0.11519	0.0514997	0.0011916	1.036	0.26	-0.041	0.24	-0.0071	0.097	0.007	0.11	0.004952	0.00065	0.0637921	0.0160135	0.000268	4.64392e-07	98.7842	28.2177	0.0260762	0.034595	28.0361	0.0259068	0.0343648	28.2542	0.0264157	1.82821e-14	DT-37a	0.0045284	3.6766e-06	4.07e-05	2.90452	0.287904	0.085703	2.90507	0.999564	0.0038001
2138-06A	FCs-A9	sanidine	12	1195.46	0.305287	346.974	0.265296	4.55677	0.106593	-0.0207071	0.116732	0.0142901	0.0009439	1.036	0.26	-0.041	0.24	-0.0071	0.097	0.007	0.11	0.004952	0.00065	-0.002844	0.0160328	0.0026396	4.6495e-07	99.6418	28.1891	0.0246723	0.033534	28.0077	0.0245121	0.0333105	28.2255	0.0250209	1.85113e-14	DT-37a	0.0045284	3.6766e-06	1.2e-05	8.47913	0.290701	0.0825867	8.47896	0.999952	0.0013883
2138-07A	FCs-A9	sanidine	12	1965.31	0.316228	572.389	0.281548	7.25882	0.106191	0.194276	0.116093	0.005937	0.0013543	1.036	0.26	-0.041	0.24	-0.0071	0.097	0.007	0.11	0.004952	0.00065	0.0161864	0.0096725	0.0013502	2.80503e-07	99.9299	28.1734	0.0166981	0.0281792	27.9922	0.0165897	0.0279894	28.2099	0.0171436	3.05374e-14	DT-37a	0.0045284	3.6766e-06	2.34938e-06	34.1215	0.291704	0.054766	34.1213	0.999999	0.0003138
2138-08A	FCs-A9	sanidine	12	568.377	0.290689	165.145	0.264017	2.18882	0.105405	0.169075	0.116409	0.0047046	0.0008808	1.036	0.26	-0.041	0.24	-0.0071	0.097	0.007	0.11	0.004952	0.00065	0.0488423	0.0336282	0.0030002	9.75218e-07	99.8132	28.2076	0.050384	0.0552723	28.0261	0.0500569	0.0549099	28.244	0.0506848	8.81059e-15	DT-37a	0.0045284	3.6766e-06	6.25715e-06	32.8933	0.291008	0.168874	32.8926	0.999987	0.0005315
2138-09A	FCs-A9	sanidine	12	1479.76	0.305287	429.681	0.274905	5.53667	0.105794	0.29703	0.116409	0.0121323	0.000995	1.036	0.26	-0.041	0.24	-0.0071	0.097	0.007	0.11	0.004952	0.00065	0.0329906	0.0129294	0.0019322	3.74952e-07	99.7956	28.2202	0.020772	0.0307963	28.0386	0.0206371	0.0305901	28.2567	0.0211571	2.29238e-14	DT-37a	0.0045284	3.6766e-06	6.84516e-06	12.4264	0.290826	0.0695681	12.4262	0.999984	0.0008636
2138-10A	FCs-A9	sanidine	12	1151.6	0.305287	334.699	0.265182	4.18938	0.104288	0.0938657	0.117401	0.0024419	0.0011843	1.036	0.26	-0.041	0.24	-0.0071	0.097	0.007	0.11	0.004952	0.00065	0.0133937	0.0167519	0.0008744	4.85805e-07	99.9529	28.2382	0.0260993	0.0346232	28.0566	0.0259298	0.0343928	28.2747	0.0264391	1.78564e-14	DT-37a	0.0045284	3.6766e-06	1.57711e-06	79.4544	0.291097	0.0854625	79.454	0.999999	0.0001537
2138-11A	FCs-A9	sanidine	12	1880.37	0.322025	547.24	0.27642	7.04188	0.105407	0.21762	0.114904	0.0071495	0.0010402	1.036	0.26	-0.041	0.24	-0.0071	0.097	0.007	0.11	0.004952	0.00065	0.0189988	0.0100314	0.0018888	2.9091e-07	99.9104	28.1889	0.0167684	0.0282309	28.0076	0.0166595	0.0280408	28.2254	0.0172129	2.91956e-14	DT-37a	0.0045284	3.6766e-06	3.00121e-06	23.0064	0.291486	0.0562612	23.0062	0.999997	0.0004781
2138-12A	FCs-A9	sanidine	12	1419.23	0.305287	413.291	0.274722	5.00528	0.105794	0.220257	0.117063	0.0050135	0.000936	1.036	0.26	-0.041	0.24	-0.0071	0.097	0.007	0.11	0.004952	0.00065	0.0254704	0.0135371	-0.0003038	3.92576e-07	99.9239	28.1755	0.0214281	0.0312166	27.9942	0.0212889	0.0310077	28.2119	0.0218051	2.20493e-14	DT-37a	0.0045284	3.6766e-06	2.54886e-06	33.8924	0.291666	0.0721401	33.8921	0.999998	0.0003242
2138-13A	FCs-A9	sanidine	12	636.19	0.282312	184.794	0.264112	2.31325	0.107422	0.220452	0.116409	0.0051273	0.0008741	1.036	0.26	-0.041	0.24	-0.0071	0.097	0.007	0.11	0.004952	0.00065	0.0570558	0.0301282	0.0008691	8.73718e-07	99.8272	28.2198	0.0449906	0.0504091	28.0382	0.0446984	0.0500779	28.2563	0.0452888	9.85889e-15	DT-37a	0.0045284	3.6766e-06	5.7868e-06	31.6882	0.290922	0.15078	31.6876	0.999989	0.0004819
2138-14A	FCs-A9	sanidine	12	770.92	0.290689	224.327	0.264334	3.06286	0.10619	0.116429	0.116409	0.0061864	0.0009432	1.036	0.26	-0.041	0.24	-0.0071	0.097	0.007	0.11	0.004952	0.00065	0.0248319	0.0248277	0.0041568	7.20005e-07	99.7935	28.1602	0.0374167	0.0437581	27.9791	0.0371737	0.0434696	28.1967	0.0377182	1.1968e-14	DT-37a	0.0045284	3.6766e-06	6.91594e-06	22.8609	0.291444	0.125057	22.8605	0.999985	0.0006123
2138-15A	FCs-A9	sanidine	12	1469.96	0.305287	422.827	0.279619	5.22055	0.105406	0.0061535	0.114904	0.0045958	0.000901	1.036	0.26	-0.041	0.24	-0.0071	0.097	0.007	0.11	0.004952	0.00065	0.0006965	0.0130065	0.000379	3.77189e-07	99.9073	28.517	0.0213801	0.0313831	28.3336	0.0212413	0.031173	28.5539	0.0217639	2.25581e-14	DT-37a	0.0045284	3.6766e-06	3.10482e-06	26.0119	0.288097	0.0715516	26.0116	0.999996	0.0004035
2138-16A	FCs-A9	sanidine	11.9429	987.636	0.300167	286.63	0.273546	3.50312	0.105794	0.104024	0.116093	0.0100111	0.0009364	1.036	0.26	-0.041	0.24	-0.0071	0.097	0.007	0.11	0.004952	0.00065	0.0173825	0.0193993	4.63584e-06	5.6258e-07	99.7173	28.2128	0.0303389	0.0379094	28.0313	0.0301419	0.0376581	28.2493	0.0306578	1.52919e-14	DT-37a	0.0045284	3.6766e-06	9.46905e-06	12.9497	0.290675	0.10177	12.9495	0.999969	0.0009453
2138-17A	FCs-A9	sanidine	12	832.592	0.286356	239.529	0.273216	3.2303	0.105406	0.0744283	0.116409	0.0033733	0.001111	1.036	0.26	-0.041	0.24	-0.0071	0.097	0.007	0.11	0.004952	0.00065	0.0148881	0.0232856	0.0036785	6.75283e-07	99.8997	28.5105	0.0367987	0.0433785	28.3271	0.0365597	0.0430922	28.5473	0.0371047	1.2779e-14	DT-37a	0.0045284	3.6766e-06	3.3606e-06	48.6774	0.288142	0.120489	48.6769	0.999997	0.0002576
2138-18A	FCs-A9	sanidine	12	945.117	0.300167	272.419	0.268904	3.49055	0.105406	0.411016	0.115785	0.0019846	0.0011843	1.036	0.26	-0.041	0.24	-0.0071	0.097	0.007	0.11	0.004952	0.00065	0.0723164	0.0203719	0.0017363	5.90785e-07	100.023	28.4923	0.0323506	0.0396666	28.309	0.0321405	0.0394041	28.5292	0.0326663	1.45337e-14	DT-37a	0.0045284	3.6766e-06	-7.88235e-07	-180.862	0.288685	0.105236	-180.862	1	6.65e-05
2138-19A	FCs-A9	sanidine	12	1477.87	0.305287	426.903	0.274873	5.3326	0.104653	0.210685	0.116409	0.0123906	0.0014422	1.036	0.26	-0.041	0.24	-0.0071	0.097	0.007	0.11	0.004952	0.00065	0.0236717	0.0130793	0.0007893	3.79299e-07	99.7777	28.3612	0.0218073	0.0315854	28.1788	0.0216657	0.0313741	28.3979	0.0221837	2.27756e-14	DT-37a	0.0045284	3.6766e-06	7.44416e-06	14.9082	0.289316	0.0699288	14.9081	0.999989	0.0007137
2138-20A	FCs-A9	sanidine	12	1063.01	0.295297	304.521	0.273686	3.87512	0.105794	0.156866	0.116409	0.0049966	0.0009149	1.036	0.26	-0.041	0.24	-0.0071	0.097	0.007	0.11	0.004952	0.00065	0.0247168	0.0183422	0.0014739	5.31924e-07	99.8894	28.6281	0.028867	0.0369483	28.4439	0.0286795	0.0367029	28.665	0.0291975	1.62464e-14	DT-37a	0.0045284	3.6766e-06	3.70265e-06	30.5726	0.28692	0.0957364	30.5722	0.999995	0.0003727
2138-21A	FCs-A9	sanidine	12	1227.8	0.305287	354.307	0.274122	4.54921	0.10619	0.226508	0.115484	0.005541	0.0013542	1.036	0.26	-0.041	0.24	-0.0071	0.097	0.007	0.11	0.004952	0.00065	0.0306862	0.0156451	0.0018062	4.53709e-07	99.9026	28.4251	0.0258192	0.0345116	28.2423	0.0256515	0.0342818	28.4619	0.0261635	1.89025e-14	DT-37a	0.0045284	3.6766e-06	3.26114e-06	39.1901	0.289022	0.0832045	39.1898	0.999998	0.0002888
2138-22A	FCs-A9	sanidine	12	1010.27	0.295297	290.313	0.264801	3.71014	0.104288	0.238132	0.115484	0.0030952	0.0011843	1.036	0.26	-0.041	0.24	-0.0071	0.097	0.007	0.11	0.004952	0.00065	0.0394004	0.0191075	0.0016357	5.54117e-07	99.9558	28.559	0.0300738	0.0378651	28.3753	0.0298785	0.0376139	28.5959	0.0303982	1.54884e-14	DT-37a	0.0045284	3.6766e-06	1.48022e-06	96.3127	0.28781	0.0974308	96.3123	1	0.0001272
2138-23A	FCs-A9	sanidine	12	1064.27	0.300167	309.574	0.26496	4.06338	0.105794	0.0045907	0.116409	0.0018906	0.001176	1.036	0.26	-0.041	0.24	-0.0071	0.097	0.007	0.11	0.004952	0.00065	0.0007126	0.0180688	0.002638	5.23994e-07	99.95	28.2141	0.0280453	0.0361006	28.0326	0.0278631	0.0358609	28.2506	0.0283739	1.6516e-14	DT-37a	0.0045284	3.6766e-06	1.67562e-06	80.3612	0.291339	0.0919025	80.3608	0.999999	0.0001541
2138-24A	FCs-A9	sanidine	12	316.562	0.278568	91.6461	0.263757	1.24535	0.105025	0.0632934	0.116409	0.0019024	0.0008171	1.036	0.26	-0.041	0.24	-0.0071	0.097	0.007	0.11	0.004952	0.00065	0.0331976	0.0610571	0.0039733	1.77066e-06	99.8632	28.3231	0.0900152	0.0928624	28.1409	0.0894307	0.0922573	28.3597	0.0903929	4.88939e-15	DT-37a	0.0045284	3.6766e-06	4.58096e-06	77.8067	0.289958	0.301619	77.8052	0.999992	0.0003464
2138-25A	FCs-A9	sanidine	12	920.084	0.295297	263.807	0.25113	4.95696	0.105025	0.15628	0.116409	0.0159837	0.0031369	1.036	0.26	-0.041	0.24	-0.0071	0.097	0.007	0.11	0.004952	0.00065	0.0284966	0.0212265	0.019019	6.15568e-07	99.5332	28.5022	0.0415292	0.0474543	28.3188	0.0412595	0.047142	28.539	0.0418305	1.40743e-14	DT-37a	0.0045284	3.6766e-06	1.56e-05	22.5052	0.287169	0.102031	22.5051	0.99999	0.0005849
2138-26A	FCs-A9	sanidine	12	1083.05	0.277849	315.247	0.266952	4.03795	0.127543	0.11135	0.127138	0.0015936	0.0012358	1.159	0.24	-0.047	0.22	0.02	0.12	0.027	0.12	0.005136	0.00079	0.0241155	0.0275348	0.0017174	7.98509e-07	99.9861	28.2023	0.0286272	0.0365487	28.0209	0.0284413	0.0363061	28.2388	0.028953	1.68208e-14	DT-37a	0.0045284	3.6766e-06	4.65341e-07	367.099	0.291567	0.0903056	367.098	1	3.18e-05
2138-27A	FCs-A9	sanidine	11.0667	742.066	0.272947	215.339	0.250813	2.86625	0.127543	0.134694	0.135306	0.0062022	0.0010255	1.159	0.24	-0.047	0.22	0.02	0.12	0.027	0.12	0.005136	0.00079	0.0427205	0.0429148	0.0031583	1.24453e-06	99.804	28.2367	0.0393698	0.04547	28.055	0.0391142	0.0451705	28.2732	0.0396701	1.14899e-14	DT-37a	0.0045284	3.6766e-06	6.56593e-06	33.5818	0.290679	0.123497	33.5806	0.999993	0.0004051
2138-28A	FCs-A9	sanidine	12	1382.33	0.3	401.971	0.273434	4.99909	0.12929	0.146512	0.128136	0.0059528	0.0011329	1.159	0.24	-0.047	0.22	0.02	0.12	0.027	0.12	0.005136	0.00079	0.0249026	0.0217791	0.0006335	6.31594e-07	99.9011	28.2054	0.0229783	0.0323173	28.024	0.0228291	0.0321014	28.2419	0.0233408	2.14482e-14	DT-37a	0.0045284	3.6766e-06	3.31239e-06	36.3865	0.291287	0.0736269	36.3859	0.999998	0.0002977
2138-29A	FCs-A9	sanidine	12	1385.79	0.294109	402.572	0.267804	5.04653	0.129658	0.241648	0.127138	0.0096211	0.0010779	1.159	0.24	-0.047	0.22	0.02	0.12	0.027	0.12	0.005136	0.00079	0.0410344	0.0215893	0.000917	6.26091e-07	99.8418	28.2172	0.0224801	0.0319716	28.0356	0.0223341	0.031758	28.2536	0.0228473	2.14803e-14	DT-37a	0.0045284	3.6766e-06	5.29992e-06	21.9944	0.290992	0.0720953	21.9938	0.999995	0.0004875
2138-30A	FCs-A9	sanidine	12	1481.97	0.3	431.333	0.26813	5.51487	0.128222	0.341863	0.137155	0.0051976	0.0011258	1.159	0.24	-0.047	0.22	0.02	0.12	0.027	0.12	0.005136	0.00079	0.0542001	0.0217451	0.0016482	6.30607e-07	99.9609	28.1974	0.0213594	0.0311823	28.016	0.0212207	0.0309737	28.2339	0.0217375	2.30148e-14	DT-37a	0.0045284	3.6766e-06	1.3085e-06	90.4145	0.291544	0.0677991	90.4139	1	0.0001221
2138-31A	FCs-A9	sanidine	12	1359.02	0.3	394.691	0.273357	4.87506	0.128222	0.0248094	0.1262	0.0102516	0.0010915	1.159	0.24	-0.047	0.22	0.02	0.12	0.027	0.12	0.005136	0.00079	0.0043001	0.0218734	0.0003803	6.34329e-07	99.7797	28.2067	0.0232689	0.0325253	28.0253	0.0231178	0.0323082	28.2432	0.0236289	2.10597e-14	DT-37a	0.0045284	3.6766e-06	7.37911e-06	16.1116	0.290919	0.0748737	16.1111	0.999989	0.0006703
2138-32A	FCs-A9	sanidine	12	788.023	0.288444	227.665	0.255748	3.16588	0.127543	0.103633	0.127796	0.0325049	0.0011432	1.159	0.24	-0.047	0.22	0.02	0.12	0.027	0.12	0.005136	0.00079	0.0311575	0.0384222	0.00482	1.11424e-06	98.8096	28.0805	0.0379017	0.0441408	27.8998	0.0376556	0.0438499	28.1168	0.0382018	1.21477e-14	DT-37a	0.0045284	3.6766e-06	3.99e-05	5.27172	0.289396	0.119528	5.27162	0.999743	0.0026289
2138-33A	FCs-A9	sanidine	12	1147.17	0.306105	333.14	0.261713	4.19498	0.127543	-0.0708144	0.126506	0.0036782	0.001051	1.159	0.24	-0.047	0.22	0.02	0.12	0.027	0.12	0.005136	0.00079	-0.0145549	0.0260015	0.0010845	7.54044e-07	99.8877	28.239	0.0265536	0.0349674	28.0574	0.0263812	0.0347348	28.2756	0.0268907	1.77755e-14	DT-37a	0.0045284	3.6766e-06	3.76141e-06	37.0477	0.290899	0.0848955	37.0469	0.999997	0.0003304
2138-34A	FCs-A9	sanidine	12	1317.13	0.288444	381.51	0.27322	4.91041	0.127543	0.113694	0.127464	0.0195986	0.0011484	1.159	0.24	-0.047	0.22	0.02	0.12	0.027	0.12	0.005136	0.00079	0.0204126	0.0228848	0.0018719	6.63661e-07	99.5813	28.2257	0.0241111	0.0331434	28.0441	0.0239545	0.0329223	28.2622	0.0244645	2.03564e-14	DT-37a	0.0045284	3.6766e-06	1.4e-05	8.99152	0.290145	0.077001	8.99107	0.999963	0.0011516
2138-35A	FCs-A9	sanidine	12	318.153	0.264008	92.8007	0.250265	1.08115	0.128571	0.0251025	0.126819	0.0019945	0.0011834	1.159	0.24	-0.047	0.22	0.02	0.12	0.027	0.12	0.005136	0.00079	0.0185391	0.0936601	-0.0016478	2.71614e-06	99.8324	28.1004	0.0906919	0.0934753	27.9197	0.0901031	0.0928663	28.1368	0.0910706	4.95162e-15	DT-37a	0.0045284	3.6766e-06	5.61334e-06	94.5233	0.292183	0.282873	94.5208	0.999996	0.0002715
2138-36A	FCs-A9	sanidine	12	809.025	0.288444	235.257	0.255798	3.16205	0.126575	0.12854	0.1262	0.0009364	0.0009709	1.159	0.24	-0.047	0.22	0.02	0.12	0.027	0.12	0.005136	0.00079	0.0374605	0.0367785	0.0035493	1.06658e-06	100.013	28.2372	0.0362624	0.0428079	28.0556	0.0360269	0.0425255	28.2737	0.0365664	1.25527e-14	DT-37a	0.0045284	3.6766e-06	-4.47657e-07	-391.56	0.291283	0.115866	-391.561	1	3.25e-05
2138-37A	FCs-A9	sanidine	12	1139.74	0.288444	330.367	0.261688	4.14352	0.127543	0.0022465	0.126506	0.0141585	0.0015106	1.159	0.24	-0.047	0.22	0.02	0.12	0.027	0.12	0.005136	0.00079	0.0004664	0.0262629	0.0009229	7.61625e-07	99.63	28.2188	0.0278125	0.0359225	28.0373	0.0276319	0.0356838	28.2553	0.0281424	1.76276e-14	DT-37a	0.0045284	3.6766e-06	1.24e-05	13.6423	0.290357	0.0850732	13.6418	0.999981	0.0008268
2138-38A	FCs-A9	sanidine	12	405.085	0.272947	117.296	0.255206	1.46494	0.126891	0.0720841	0.126506	0.0060369	0.0009828	1.159	0.24	-0.047	0.22	0.02	0.12	0.027	0.12	0.005136	0.00079	0.0421731	0.0740128	0.0007676	2.14637e-06	99.605	28.2417	0.0719069	0.0754209	28.06	0.0714399	0.0749286	28.2782	0.0722415	6.25862e-15	DT-37a	0.0045284	3.6766e-06	1.32e-05	28.8375	0.290048	0.22858	28.8359	0.999968	0.0007394
2138-39A	FCs-A9	sanidine	12	1024.73	0.288444	297.852	0.261404	3.71829	0.127543	0.0034186	0.127464	0.0102586	0.0011838	1.159	0.24	-0.047	0.22	0.02	0.12	0.027	0.12	0.005136	0.00079	0.0007879	0.0293777	0.0007581	8.51953e-07	99.7023	28.1619	0.0297506	0.0374156	27.9808	0.0295575	0.0371675	28.1984	0.0300712	1.58927e-14	DT-37a	0.0045284	3.6766e-06	9.9727e-06	16.5318	0.29116	0.0939182	16.5312	0.999984	0.0007179
2138-40A	FCs-A9	sanidine	12	568.733	0.272947	165.449	0.2554	2.11487	0.126575	-0.0380932	0.127138	0.0020133	0.0010509	1.159	0.24	-0.047	0.22	0.02	0.12	0.027	0.12	0.005136	0.00079	-0.0159569	0.0532568	0.0016349	1.54445e-06	99.8767	28.1869	0.0514441	0.0562337	28.0055	0.0511101	0.0558651	28.2233	0.0517457	8.82801e-15	DT-37a	0.0045284	3.6766e-06	4.13079e-06	68.6438	0.291409	0.162718	68.6423	0.999997	0.0002369
2138-41A	FCs-A9	sanidine	12	718.633	0.283019	208.581	0.260774	2.61808	0.126891	0.280132	0.13576	0.0112999	0.0010581	1.159	0.24	-0.047	0.22	0.02	0.12	0.027	0.12	0.005136	0.00079	0.0931128	0.0451254	0.0009502	1.30864e-06	99.6411	28.1858	0.0420078	0.0477529	28.0045	0.041735	0.0474388	28.2222	0.042306	1.11294e-14	DT-37a	0.0045284	3.6766e-06	1.2e-05	19.346	0.290733	0.132353	19.3449	0.999977	0.0007323
2138-42A	FCs-A9	sanidine	12	412.475	0.268328	119.546	0.255213	1.40759	0.127543	0.121703	0.126506	0.0079255	0.0010383	1.159	0.24	-0.047	0.22	0.02	0.12	0.027	0.12	0.005136	0.00079	0.0706063	0.0733928	-0.0013094	2.12839e-06	99.5075	28.1887	0.0708092	0.0743622	28.0073	0.0703494	0.0738767	28.2252	0.0711413	6.37868e-15	DT-37a	0.0045284	3.6766e-06	1.65e-05	23.374	0.290313	0.224004	23.3726	0.999954	0.0008714
2138-43A	FCs-A9	sanidine	12	584.581	0.268328	169.848	0.255421	2.23802	0.129658	-0.007521	0.135306	0.004473	0.001051	1.159	0.24	-0.047	0.22	0.02	0.12	0.027	0.12	0.005136	0.00079	-0.0030728	0.0552818	0.0027693	1.60317e-06	99.7704	28.1921	0.0505044	0.055377	28.0108	0.0501765	0.055014	28.2286	0.0508052	9.06271e-15	DT-37a	0.0045284	3.6766e-06	7.68892e-06	37.0873	0.291044	0.158319	37.0858	0.999991	0.0004152
2138-44A	FCs-A9	sanidine	12	534.413	0.272947	119.826	0.255214	1.5056	0.130414	0.110177	0.126506	0.0059261	0.0010318	1.159	0.24	-0.047	0.22	0.02	0.12	0.027	0.12	0.005136	0.00079	0.063829	0.0732888	0.0009886	2.12537e-06	99.7276	36.4381	0.0857515	0.0906163	36.203	0.0851916	0.0900212	36.4839	0.086153	6.39366e-15	DT-37a	0.0045284	3.6766e-06	9.12216e-06	32.5756	0.224576	0.219553	32.574	0.999977	0.0003927
2138-45A	FCs-A9	sanidine	12	767.317	0.277849	221.566	0.260852	2.71157	0.127543	0.0516701	0.126506	0.0232896	0.0011489	1.159	0.24	-0.047	0.22	0.02	0.12	0.027	0.12	0.005136	0.00079	0.0161945	0.0396496	9.30048e-06	1.14984e-06	99.112	28.1803	0.0394934	0.0455546	27.999	0.0392369	0.0452545	28.2167	0.0397929	1.18223e-14	DT-37a	0.0045284	3.6766e-06	2.97e-05	7.29322	0.289246	0.124502	7.29287	0.999854	0.0017929
2138-46A	FCs-A9	sanidine	12	687.564	0.277849	146.571	0.250452	1.72814	0.127543	0.163996	0.134858	0.0028576	0.0012666	1.159	0.24	-0.047	0.22	0.02	0.12	0.027	0.12	0.005136	0.00079	0.0777443	0.0639309	-0.0012374	1.854e-06	99.942	38.3888	0.073517	0.0797249	38.1411	0.0730365	0.0791993	38.4368	0.0739081	7.82071e-15	DT-37a	0.0045284	3.6766e-06	1.94108e-06	136.797	0.213508	0.176151	136.796	0.999999	7.59e-05
2138-47A	FCs-A9	sanidine	12	546.967	0.272947	105.931	0.260324	1.41221	0.127214	0.0847819	0.127138	0.0030546	0.0009826	1.159	0.24	-0.047	0.22	0.02	0.12	0.027	0.12	0.005136	0.00079	0.0556317	0.0834246	0.0032198	2.41931e-06	99.8792	42.1856	0.11095	0.116001	41.9129	0.110223	0.115238	42.2376	0.111427	5.65223e-15	DT-37a	0.0045284	3.6766e-06	4.04443e-06	70.8119	0.193968	0.251144	70.8096	0.999994	0.0001489
2138-48A	FCs-A9	sanidine	12	1054.51	0.288444	294.241	0.256241	3.59602	0.1251	0.234322	0.125901	0.0032397	0.001019	1.159	0.24	-0.047	0.22	0.02	0.12	0.027	0.12	0.005136	0.00079	0.0553737	0.0297523	1.41e-05	8.62816e-07	99.9708	29.406	0.0301748	0.0383595	29.2168	0.0299787	0.0381047	29.4439	0.0305097	1.57001e-14	DT-37a	0.0045284	3.6766e-06	9.79006e-07	157.643	0.279497	0.0929142	157.643	1	7.36e-05
2138-49A	FCs-A9	sanidine	12	988.616	0.283019	218.26	0.255688	2.76539	0.128222	-0.0291071	0.127464	0.0105159	0.001427	1.159	0.24	-0.047	0.22	0.02	0.12	0.027	0.12	0.005136	0.00079	-0.0092782	0.0406303	0.0012899	1.17828e-06	99.6747	36.9809	0.0492375	0.0575137	36.7423	0.0489159	0.0571323	37.0273	0.049609	1.16459e-14	DT-37a	0.0045284	3.6766e-06	1.09e-05	17.429	0.221129	0.121401	17.4283	0.999976	0.0004754
2138-50A	FCs-A9	sanidine	12	665.587	0.283019	151.842	0.255338	2.10397	0.130033	-0.0212931	0.125901	0.0761513	0.001522	1.159	0.24	-0.047	0.22	0.02	0.12	0.027	0.12	0.005136	0.00079	-0.0097597	0.0577069	0.0044779	1.6735e-06	96.5774	34.6972	0.0677152	0.0732397	34.4735	0.0672736	0.0727581	34.7411	0.0680777	8.10198e-15	DT-37a	0.0045284	3.6766e-06	0.0001146	2.54025	0.228503	0.174088	2.54394	0.997659	0.0045361
2138-51A	FCs-A9	sanidine	12	379.836	0.268328	88.1523	0.260275	1.14292	0.125381	-0.0214885	0.127138	0.0019321	0.0011908	1.159	0.24	-0.047	0.22	0.02	0.12	0.027	0.12	0.005136	0.00079	-0.0169713	0.100412	0.0021588	2.91194e-06	99.8336	35.2514	0.116391	0.119794	35.0241	0.115632	0.11901	35.2959	0.11686	4.70362e-15	DT-37a	0.0045284	3.6766e-06	5.57475e-06	80.5962	0.232459	0.304052	80.5937	0.999993	0.0002132
2138-52A	FCs-A9	sanidine	12	938.313	0.294109	270.801	0.256053	3.44262	0.129289	-0.260499	0.134858	0.0276161	0.0011785	1.159	0.24	-0.047	0.22	0.02	0.12	0.027	0.12	0.005136	0.00079	-0.0670107	0.0346908	0.0013805	1.00603e-06	99.0431	28.1745	0.0325161	0.0396557	27.9932	0.0323049	0.0393933	28.2109	0.0328274	1.44493e-14	DT-37a	0.0045284	3.6766e-06	3.21e-05	5.80372	0.289105	0.101221	5.80333	0.999848	0.0022096
2138-53A	FCs-A9	sanidine	12	1314.49	0.306105	324.924	0.267036	4.25253	0.129289	-0.0448328	0.125901	0.003894	0.0013454	1.159	0.24	-0.047	0.22	0.02	0.12	0.027	0.12	0.005136	0.00079	-0.0096151	0.0270015	0.0025193	7.83043e-07	99.9038	33.1389	0.0316284	0.0413678	32.9254	0.0314223	0.0410919	33.1811	0.0320053	1.73373e-14	DT-37a	0.0045284	3.6766e-06	3.22119e-06	42.9747	0.247594	0.0867893	42.974	0.999998	0.000209
2138-54A	FCs-A9	sanidine	12	339.063	0.268328	77.7405	0.250228	0.806666	0.128571	-0.139089	0.1262	0.0067833	0.0010192	1.159	0.24	-0.047	0.22	0.02	0.12	0.027	0.12	0.005136	0.00079	-0.124721	0.113164	-0.0053822	3.28175e-06	99.2806	35.4806	0.127083	0.130246	35.2518	0.126254	0.129394	35.5254	0.127582	4.14807e-15	DT-37a	0.0045284	3.6766e-06	2.41e-05	19.3232	0.229663	0.331888	19.3221	0.999852	0.0010096
